# Supplementary material for: RNA Deep Sequencing Reveals Differential MicroRNA Expression during Development of Sea Urchin and Sea Star
Source: PubMed Central journal article supplement (PMC3247247; doi:10.1371/journal.pone.0029217), 2011-12-28
Supplement: pone.0029217.s005.pdf [file pone.0029217.s005.pdf]

| <b>miRNA</b> | <b>Sequence</b>                                                          |
|--------------|--------------------------------------------------------------------------|
| spu-let-7    | E: TGAGGTAGTAGGTTATATAGTT<br>A: TGAGGTAGTAGGTTATATAGTT                   |
| spu-miR-1    | E: TGG AATGTAAAGAAGTATGTAT<br>A: TGG AATGTAAAGAAGTATGTAT                 |
| spu-miR-1b   | E: TGG AATGTAAAGAAGTATGTAC                                               |
| spu-miR-10   | E: AAC CCTGTAGATCCGAATTTGTG<br>A: AAC CCTGTAGATCCGAATTTGTG               |
| spu-miR-125  | E: TCC CTGAGACCCTAACTTGTGA<br>A: TCC CTGAGACCCTAACTTGTGA                 |
| spu-miR-137  | E: <b>T</b> TATTGCTTGAGAATACACGTA-<br>A: -TATTGCTTGAGAATACACG <b>TAG</b> |
| spu-miR-153  | E: TTGCATAGTCACAAAAGTGATT<br>A: TTGCATAGTCACAAAAGTGATT                   |
| spu-miR-182  | E: TTTGGCAATTGATAGAATTCACACT<br>A: TTTGGCAATTGATAGAATTCACACT             |
| spu-miR-183  | E: TATGGCACTATAGAATTCACTG<br>A: TATGGCACTATAGAATTCACTG                   |
| spu-miR-184  | E: TGGACGGAGAACTGATAAGGGC<br>A: TGGACGGAGAACTGATAAGGGC                   |
| spu-miR-200  | E: TAATACTGTCTGGTGATGATGTT<br>A: TAATACTGTCTGGTGATGATGTT                 |
| spu-miR-2001 | E: ATGTGACCGATATAATGGGCAT<br>A: ATGTGACCGATATAATGGGCAT                   |
| spu-miR-2002 | E: TGAATACATCTGCTGGTTTTTAT<br>A: TGAATACATCTGCTGGTTTTTAT                 |
| spu-miR-2003 | E: AACCCGTAAGGTCTTAACTTGTG<br>A: AACCCGTAAGGTCTTAACTTGTG                 |
| spu-miR-2004 | E: TCACACACAACCACAGGAAGTT<br>A: TCACACACAACCACAGGAAGTT                   |
| spu-miR-2007 | E: TATTTTCAGGCAGTATACTGGTAA<br>A: TATTTTCAGGCAGTATACTGGTAA               |
| spu-miR-2008 | E: ATCAGCCTCGCTGTCAATAC <b>G</b> A<br>A: ATCAGCCTCGCTGTCAATACG-          |
| spu-miR-2009 | E: TGAGTTGTCCCACAAAGAACAC-<br>A: TGAGTTGTCCCACAAAGAACAC <b>A</b>         |
| spu-miR-2010 | E: TTACTGTTGATGTCAGCCCCTT<br>A: TTACTGTTGATGTCAGCCCCTT                   |
| spu-miR-2011 | E: ACCAAGGTGTGCTAGTGATGAC<br>A: ACCAAGGTGTGCTAGTGATGAC                   |
| spu-miR-2012 | E: TAGTACTGGCATATGGACATTG<br>A: TAGTACTGGCATATGGACATTG                   |
| spu-miR-2013 | E: TGCAGCATGATGTAGTGGT <b>G</b> T <b>A</b><br>A: TGCAGCATGATGTAGTGGTGT-  |
| spu-miR-210  | E: TTGTGCGTGCGACAGCGACTGA<br>A: TTGTGCGTGCGACAGCGACTGA                   |
| spu-miR-219  | E: TGATTGTCCGAACGCAATTCTTG<br>A: TGATTGTCCGAACGCAATTCTTG                 |
| spu-miR-22   | E: <b>T</b> CAGCTGCCCGGTGAAGTGTATA<br>A: -CAGCTGCCCGGTGAAGTGTATA         |
| spu-miR-242  | E: TTGCGTAGGCGTTGTGCACAGT<br>A: TTGCGTAGGCGTTGTGCACAGT                   |
| spu-miR-252a | E: CTAAGTACTAGTGCCGTAGGTT<br>A: CTAAGTACTAGTGCCGTAGGTT                   |
| spu-miR-252b | E: CTAAGTAGTAGTGCCGCAGGTA                                                |

|              |                                                                  |
|--------------|------------------------------------------------------------------|
|              | A: CTAAGTAGTAGTGCCGCAGGTA                                        |
| spu-miR-29   | E: AAGCACCAGTTGAAATCAGAGC<br>A: AAGCACCAGTTGAAATCAGAGC           |
| spu-miR-29b  | E: TAGCACCATGAGAAAGCAGTAT<br>A: TAGCACCATGAGAAAGCAGTAT           |
| spu-miR-31a  | E: AGGCAAGATGTTGGCATAGCT <b>G</b><br>A: AGGCAAGATGTTGGCATAGCT-   |
| spu-miR-31b  | E: AGGCAAGATGCTGGCATAGCT                                         |
| spu-miR-33   | E: GTGCATTGTCGTTGCATTGCAT<br>A: GTGCATTGTCGTTGCATTGCAT           |
| spu-miR-34   | E: CGGCAGTGTAGTTAGCTGGTTG<br>A: CGGCAGTGTAGTTAGCTGGTTG           |
| spu-miR-4847 | E: TAATGATGGCGCGGTGCGGTGC<br>A: TAATGATGGCGCGGTGCGGTGC           |
| spu-miR-4850 | E: TTATCATGACTGTAAACAGGAGG<br>A: TTATCATGACTGTAAACAGGAGG         |
| spu-miR-4851 | E: TGATTACTTGCTTTGGAGTTCTT<br>A: TGATTACTTGCTTTGGAGTTCTT         |
| spu-miR-4854 | E: TGTTGCAGTGACGACTTCGCGC<br>A: TGTTGCAGTGACGACTTCGCGC           |
| spu-miR-4855 | E: TGTGTAACATCTCATTTCAGTGGGT<br>A: TGTGTAACATCTCATTTCAGTGGGT     |
| spu-miR-7    | E: TGGAAGACTAGTGATTTTGTGT<br>A: TGGAAGACTAGTGATTTTGTGT           |
| spu-miR-71   | E: TGAAAGACATGGGTAGTGAGATT<br>A: TGAAAGACATGGGTAGTGAGATT         |
| spu-miR-79   | E: ATAAAGCTAGGTTACCAAAGAT <b>A</b><br>A: ATAAAGCTAGGTTACCAAAGAT- |
| spu-miR-9    | E: TCTTTGGTTATCTAGCTGTATG<br>A: TCTTTGGTTATCTAGCTGTATG           |
| spu-miR-92a  | E: TATTGCACTTGTCCCGCCTAC-<br>A: TATTGCACTTGTCCCGCCTACT <b>T</b>  |
| spu-miR-92b  | E: TATTGCACTTGTCCCGCCTGC<br>A: TATTGCACTTGTCCCGCCTGC             |
| spu-miR-92c  | E: TATTGCACTCGTCCCGCCTGC<br>A: TATTGCACTCGTCCCGCCTGC             |
| spu-miR-96   | E: TTTGGCACTAGCACATTTTGC<br>A: TTTGGCACTAGCACATTTTGC             |

E: Embryo data from Illumina sequencing

A: Adult data from miRBase
