# Supplementary material for: RNA Deep Sequencing Reveals Differential MicroRNA Expression during Development of Sea Urchin and Sea Star
Source: PubMed Central journal article supplement (PMC3247247; doi:10.1371/journal.pone.0029217), 2011-12-28
Supplement: pone.0029217.s006.pdf [file pone.0029217.s006.pdf]

|                  |                                                                                                                                                                                |
|------------------|--------------------------------------------------------------------------------------------------------------------------------------------------------------------------------|
| miR-1            | Pmi TGGAATGTAAAGAAGTATGTAT<br>Hsn TGGAATGTAAAGAAGTATGTAT                                                                                                                       |
| miR-7            | Pmi TGGAAGACTAGTGATTTTGTGT<br>Hsn TGGAAGACTAGTGATTTTGTGT                                                                                                                       |
| miR-8, 141, 200  | Pmi TAATACTGTCTGGTAATGATGTT<br>Hsn<br>R1 TAATACTGTCTGGTAATGATGT-                                                                                                               |
| miR-9            | Pmi TCTTTGGTTATCTAGCTGTATGA<br>Hsn<br>R1 TCTTTGGTTATCTAGCTGTATGA                                                                                                               |
| miR-10           | Pmi AACCCGTAGATCCGAATTTGT <b>G</b><br>Hsn<br>R1 AACCCGTAGATCCGAATTTGT-                                                                                                         |
| miR-22, 745, 980 | Pmi TCAGCTGCCCCGGTGAAGTGTAG<br>Hsn TCAGCTGCCCCGGTGAAGTGTAG                                                                                                                     |
| miR-29, 83, 285  | Pmi AAGCACCAGTTGAAATCAGAGC<br>Hsn<br>R1 AAGCACCAGTTGAAATCAGAGC                                                                                                                 |
| miR-31           | Pmi<br>31a AGGCAAGATGTTGGCATAGCTG<br>31b AGGCAAGATG <b>C</b> TGGCATAGCTG<br>Hsn<br>R1 AGGCAAGATGTTGGCATAGCT-                                                                   |
| miR-33           | Pmi GTGCATTGTAGTTGCATTGCAT<br>Hsn GTGCATTGTAGTTGCATTGCAT                                                                                                                       |
| miR-34           | Pmi TGGCAGTGTGGTTAGCTGGTTG<br>Hsn TGGCAGTGTGGTTAGCTGGTTG                                                                                                                       |
| miR-71           | Pmi TGAAAGACATGGGTAGTGAGAT<br>Hsn<br>R1 TGAAAGACATGGGTAGTGAGAT                                                                                                                 |
| miR-79           | Pmi ATAAAGCTAGGTTACCAAAGATA<br>Hsn -TAAAGCTAGGTTACCAAAGAT-                                                                                                                     |
| miR-92           | Pmi<br>92a TATTGCACTTGT <b>CCGGCCAGC</b><br>92b TATTGCACTTGTCTCGGCCTGC<br>92c TATTGCACT <b>CGTCCGGCCTGC</b><br>92d TATTGCACT <b>CGTCCGGCCTAG</b><br>Hsn TATTGCACTTGTCTCGGCCTGC |
| miR-96           | Pmi TTTGGCACTAGCACATTTTGCT-<br>Hsn TTTGGCACTAGCACATTTTGCT                                                                                                                      |
| miR-100          | Pmi AACCCGTAGATCCGAACTTGT<br>Hsn AACCCGTAGATCCGAATTTGT                                                                                                                         |
| miR-124          | Hsn TAAGGCACGCGGTGAATGCCA                                                                                                                                                      |
| miR-125          | Pmi TCCCTGAGACCCTAACTTGTGA<br>Hsn<br>R1 TCCCTGAGACCCTAACTTGTGA                                                                                                                 |
| miR-133          | Hsn TTTGGTCCCCTTCAACCAGCCGT                                                                                                                                                    |
| miR-137          | Pmi TATTGCTTGAGAATACACGTAG<br>Hsn TATTGCTTGAGAATACACGTAG                                                                                                                       |
| miR-153          | Hsn TTGCATAGTCACAAAAGTGATT                                                                                                                                                     |
| miR-1692         | Pmi TGTAGCTCAGTTGGTAGAG                                                                                                                                                        |
| miR-182, 263b    | Pmi TTTGGCAATAGATAGAATTCACA<br>Hsn TTTGGCAATAGATAGAATTCAC-                                                                                                                     |
| miR-183          | Pmi TATGGCACTGTAGAATTCACT                                                                                                                                                      |

|             |                                                                                              |
|-------------|----------------------------------------------------------------------------------------------|
| miR-184     | Pmi TGGACGGAGAACTGATAAGGGC<br>Hsn<br>R1 TGGACGGAGAACTGATAAGGGC                               |
| miR-190     | Hsn TGATATGTTTGGTTTTGGGTTG                                                                   |
| miR-193     | Hsn TACTGGCCAGCACAAATCCCAGA                                                                  |
| miR-210     | Hsn TTGTGCGTGCGACAGCGACTGA                                                                   |
| miR-219     | Pmi TGATTGTCCAAACGCAATTCT                                                                    |
| miR-242     | Pmi TTGCGTAGGCGTTGTGCACAGT<br>Hsn TTGCGTAGGCGTTGTGCACAGT                                     |
| miR-252a    | Hsn CTAAGTACTAGTGCCGCAGTT-<br>Pmi CTAAGTACTAGTGCCGCAGTT <b>G</b>                             |
| miR-252b    | Pmi CTAAGTAGTAGTGCCGCAGGTA<br>Hsn CTAAGTAGTAGTGCCGCAGGTA                                     |
| miR-278     | Pmi TCGGTGGGACTTTTCGTTTCGAT <b>T</b><br>Hsn TCGGTGGGACTTTTCGTTTCGAT-                         |
| miR-365     | Hsn TAATGCCCTGTGAAATCCCCAAA                                                                  |
| miR-375     | Hsn TTTGTTCGTTTCGGCTCGCGTCA                                                                  |
| miR-2001    | Pmi ATGTGACCGTTACAATGGGCAT<br>Hsn ATGTGACCGTTACAATGGGCAT                                     |
| miR-2002    | Hsn<br>G T-GAATACATCTGCTGGTTCCAT<br>R1 T-GAATACATCTGCTGGTTCCAT<br>R2 TAGAATACATCTGCTGGTTCCAT |
| miR-2003    | Hsn AACCCGTAAGATCCGAACTTGT                                                                   |
| miR-2004    | Pmi TCACACACAACCACAGGAAGT <b>T</b><br>Hsn TCACACACAACCACAGGAAGT-                             |
| miR-2005    | Hsn AGTCCAATAGGGAGGGCATCGC                                                                   |
| miR-2006-3p | Pmi GAGCACACTTGGTAGCGGTGCC<br>Hsn GAGCACACTTGGTAGCGGTGCC                                     |
| miR-2006-5p | Hsn CATCGCCACCAGGTGTACTTCA-                                                                  |
| miR-2007    | Hsn TATTTTCAGGCAGTATACTGGTAA<br>Pmi TATTTTCAGGC <b>GG</b> TATACTGGTAA                        |
| miR-2008-3p | Pmi ATCAGCCTCGCTGTCAATAC <b>GA</b><br>Hsn<br>R2 ATCAGCCTCGCTGTCAATAC--                       |
| miR-2009    | Pmi TGAGTTGTCCCACAAAGAACAC<br>Hsn TGAGTTGTCCCACAAAGAACAC                                     |
| miR-2010    | Pmi TTAGTGTGATGTCAGCCCCT <b>C</b><br>Hsn TTAGTGTGATGTCAGCCCCT-                               |
| miR-2011    | Pmi ACCAAGGTGTGTTAGTGATGAC<br>Hsn<br>R2 ACCAAGGTGTGTTAGTGATGAC                               |
| miR-2012    | Pmi TAGTACTGGCATATGGACATT-<br>Hsn TAGTACTGGCATATGGACATT <b>C</b>                             |
| miR-2013    | Pmi TGCAGCATGATGTAGTGGT <b>GA</b><br>Hsn TGCAGCATGATGTAGTGGTG-                               |
| miR-4171    | Pmi TGACTCTCTTAAGGTAGCC                                                                      |
| let-7       | Hsn<br>R1 T-GAGGTAGTCGGTTGTAAAGA<br>R2 TAGAGGTAGTCGGTTGTAAAGA<br>R3 T-GATGTAGTCGGTTGTAAAGA   |
