# Supplementary material for: RNA Deep Sequencing Reveals Differential MicroRNA Expression during Development of Sea Urchin and Sea Star
Source: PubMed Central journal article supplement (PMC3247247; doi:10.1371/journal.pone.0029217), 2011-12-28
Supplement: pone.0029217.s008.pdf [file pone.0029217.s008.pdf]

```

spu-let-7      TGAGGTAGTAGGTTATATAGTT 22
sko-let-7      TGAGGTAGTAGGTTGTATAGTT 22
                *****
                *****

spu-miR-1      TGGAATGTAAAGAAGTATGTAT 22
pmi-miR-1      TGGAATGTAAAGAAGTATGTAT 22
sko-miR-1      TGGAATGTAATGAAGTATGTAT 22
                *****
                *****

spu-miR-1b     TGGAATGTAAAGAAGTATGTAC 22
sko-miR-1b     TGGAATGTAATGAAGTATGTAT 22
                *****
                *****

spu-miR-10     AACCTGTAGATCCGAATTTGTG 23
pmi-miR-10     AACCTGTAGATCCGAATTTGTG 23
sko-miR-10     TACCCTGTAGATCCGAATTTGTG 23
                *****

pmi-miR-100    AACCCGTAGATCCGAACCTTGT- 21
sko-miR-100    AACCCGTAGATCCGAACCTTGTG 22
                *****

spu-miR-124    TAAGGCACGCGGTGAATGCCA- 21
sko-miR-124    TAAGGCACGCGGTGAATGCCAA 22
                *****

spu-miR-125    TCCCTGAGACCCTAACTTGTGA 22
pmi-miR-125    TCCCTGAGACCCTAACTTGTGA 22
sko-miR-125    TCCCTGAGACCCTAACTTGTGA 22
                *****

spu-miR-133    TTTGGTCCCCTTCAACCAGCCGT 23
sko-miR-133    -TTGGTCCCCTTCAACCAGCTGT 22
                ***** **

spu-miR-137    TTATTGCTTGAGAATACACGT-- 21
pmi-miR-137    -TATTGCTTGAGAATACACGTAG 22
sko-miR-137    -TATTGCTTGAGAATACACGTAG 22
                *****

spu-miR-153    TTGCATAGTCACAAAAGTGATT 22
sko-miR-153    TTGCATAGTCACAAAAGTGATT 22
                *****

pmi-miR-1692   TGTAGCTCAGTTGGTAGAG 19

spu-miR-182    TTTGGCAATTGATAGAATTCACACT 25
pmi-miR-182    TTTGGCAATAGATAGAATTCACA-- 23
sko-miR-182    TTTGGCAATAGATAGAATTCACA-- 23
                *****

spu-miR-183    TATGGCACTATA-GAATTCACTG 22
pmi-miR-183    TATGGCACTGTA-GAATTCACT- 21
sko-miR-183    AATGGCACTGTATGAATTCACTG 23
                ***** ** *****

```

```

spu-miR-184      TGGACGGAGAACTGATAAGGGC 22
pmi-miR-184      TGGACGGAGAACTGATAAGGGC 22
sko-miR-184      TGGACGGAGAACTGATAAGGGC 22
*****

spu-miR-200      TAATACTGTCTGGTGATGATGTT 23
pmi-miR-200      TAATACTGTCTGGTAATGATGTT 23
sko-miR-200      TAATACTGTCTGGTAATGATGTT 23
*****

spu-miR-2001     ATGTGACCGATATAATGGGCAT 22
pmi-miR-2001     ATGTGACCGTTACAATGGGCAT 22
sko-miR-2001     TTGTGACCGTTATAATGGGCAT 22
*****

spu-miR-2002     TGAATACATCTGCTGGTTTTTAT 23

spu-miR-2003     AACCCGTAAGGTCTTAACTTGTG 23

spu-miR-2004     TCACACACAACCACAGGAAGTT 22
pmi-miR-2004     TCACACACAACCACAGGAAGTT 22
*****

spu-miR-2005     AGTCCAATAGGGAGGGCATTGCA 23

spu-miR-2006     GAGCACACTTGGTAGCGGTGCC 22
pmi-miR-2006     GAGCACACTTGGTAGCGGTGCC 22
*****

spu-miR-2007     TATTTTCAGGCAG-TATACTGGTAA 23
pmi-miR-2007     TATTTTCAGGCGG-TATACTGGTAA 23
sko-miR-2007     TATTTTCAGGCGTTTATACTGGTGA 24
*****

spu-miR-2008     ATCAGCCTCGCTGTCAATACGA 22
sko-miR-2008     ATCAGCCTCGCTGTCAATACGG 22
*****

spu-miR-2009     TGAGTTGTCCCACAAAGAACAC 22
pmi-miR-2009     TGAGTTGTCCCACAAAGAACAC 22
*****

spu-miR-2010     TTACTGTTGATGTCAGCCCCTT 22
pmi-miR-2010     TTACTGTTGATGTCAGCCCCTC 22
*****

spu-miR-2011     ACCAAGGTGTGCTAGTGATGAC 22
pmi-miR-2011     ACCAAGGTGTGTTAGTGATGAC 22
sko-miR-2011     ACCAAGGTGTGTTAGTGATGAC 22
*****

spu-miR-2012     TAGTACTGGCATATGGACATTG 22
pmi-miR-2012     TAGTACTGGCATATGGACATT- 21
sko-miR-2012     TAGTACTGGCATATGGACATTG 22
*****

```

```

spu-miR-2013      TGCAGCATGATGTAGTGGTGTA 21
pmi-miR-2013     TGCAGCATGATGTAGTGGTG-A 22
sko-miR-2013     TGCAGCATGATGTAGTGGTG 22
*****

spu-miR-210      TTGTGCGTGCGACAGCGACTGA 22
sko-miR-210     TTGTGCGTGCGACAGCGACTTC 22
*****

spu-miR-219      TGATTGTCCGAACGCAATTCTTG 23

spu-miR-22       TCAGCTGCCCGGTGAAGTGTATA 23
pmi-miR-22      TCAGCTGCCCGGTGAAGTGTAG- 22
*****

spu-miR-242      TTGCGTAGGCGTTGTGCACAGT- 22
pmi-miR-242     TTGCGTAGGCGTTGTGCACAGT- 22
sko-miR-242     -TGCGTAGGCGTTGTGCACAGTG 22
*****

spu-miR-252a     CTAAGTACTAGTGCCGTAGGTT- 22
pmi-miR-252a    CTAAGTACTAGTGCCGCAGGTTG 23
sko-miR-252a    CTAAGTACTAGTGCCGCAGGAGT 23
***** ***

spu-miR-252b     CTAAGTAGTAGTGCCGCAGGTA- 22
pmi-miR-252b    CTAAGTAGTAGTGCCGCAGGTA- 23
sko-miR-252b    CTAAGTAGTAGTGCCGCAGGTAA 23
*****

spu-miR-278      TCGGTGGGACTTTCGTTTCGATT 22
pmi-miR-278     TCGGTGGGACTTTCGTTTCGATT 22
sko-miR-278     TCGGTGGGACTTTCGTTTCGTTT 22
***** **

spu-miR-29       AAGCACCAGTTGAAATCAGAGC 22
pmi-miR-29      AAGCACCAGTTGAAATCAGAGC 22
sko-miR-29b     TAGCACCATTTGAAATCAGTGT 22
***** *

spu-miR-29b      TAGCACCATGAGAAAGCAGTAT 22
sko-miR-29      TAGCACCATATGAAATCAGTTT 22
sko-miR-29b     TAGCACCATTTGAAATCAGTGT 22
***** *

spu-miR-31a      AGGCAAGATGTTGGCATAGCTG 22
pmi-miR-31a     AGGCAAGATGTTGGCATAGCTG 22
sko-miR-31a     AGGCAAGATGTTGGCATAGCTG 22
*****

spu-miR-31b      AGGCAAGATGCTGGCATAGCT 21
pmi-miR-31b     AGGCAAGATGCTGGCATAGCT 21
*****

spu-miR-33       GTGCATTGTCGTTGCATTGCAT 22
pmi-miR-33      GTGCATTGTAGTTGCATTGCAT 22
*****

```

```

spu-miR-34      CGGCAGTGTAGTTAGCTGGTTG 22
pmi-miR-34      TGGCAGTGTGGTTAGCTGGTTG 22
sko-miR-34      TGGCAGTGTGGTTAGCTGGTTG 22
                *****
                *****

spu-miR-375     -TTGTTTCGTTTCGGCTCGCGTCAA 22
sko-miR-375     TTTGTTTCGTTTCGGCTCGCGCGA- 22
                *****
                *****

pmi-miR-4171    TGA CTCTCTTAAGGTAGCC 19

spu-miR-4847    TAATGATGGCGCGGTGCGGTGC 22

spu-miR-4848a   TGGGTTGAGGCTTTTGGGCAGGA 23

spu-miR-4848b   TGGGTTGAGGCTTTGGGGCAGGA 23

spu-miR-4849    TAATGATGGCGCGGTGCGGTGC 22

spu-miR-4850    TTATCATGACTGTAAACAGGAGG 23

spu-miR-4851    TGATTACTTGCTTTGGAGTTCTT 23

spu-miR-4852    AATTCTATCATTTTGGCTGCAT 22

spu-miR-4853    TAGCTCCGTTGTTGCGTCTTGGTA 24

spu-miR-4854    TGTTGCAGTGACGACTTCGCGC 22

spu-miR-4855    TGTGTAACATCTCATT CAGTGGGT 24

spu-miR-7       TGGAAGACTAGTGATTTTGTGT 23
pmi-miR-7       TGGAAGACTAGTGATTTTGTGT 23
sko-miR-7       TGGAAGACTAGTGATTTTGTGT 23
                *****

spu-miR-71      TGAAAGACATGGGTAGTGAGATT 23
pmi-miR-71      TGAAAGACATGGGTAGTGAGAT- 22
sko-miR-71      TGAAAGACACAGGTAGTGAGAT- 22
                *****
                *****

spu-miR-79      ATAAAGCTAGGTTACCAAAGATA 23
sko-miR-79      ATAAAGCTAGGTTACCAAAGACA 23
                *****
                *****

spu-miR-9       TCTTTGGTTATCTAGCTGTATG- 22
pmi-miR-9       TCTTTGGTTATCTAGCTGTATGA 23
sko-miR-9       TCTTTGGTTATCTAGCTGTAT-- 21
                *****

spu-miR-92a     TATTGCACTTGTCCCGGCCTAC 22
pmi-miR-92a     TATTGCACTTGTCCCGGCCAGC 22
sko-miR-92a     TATTGCACTTGTCCCGGCCTAA 22
                *****
                *****

```

```
spu-miR-92b      TATTGCACTTGTCCCGGCCTGC 22
pmi-miR-92b      TATTGCACTTGTCTCGGCCAGC 22
sko-miR-92b      TATTGCACTTGTCCCGGCCTGC 22
                  ***** **

spu-miR-92c      TATTGCACTCGTCCCGGCCTGC 22
pmi-miR-92c      TATTGCACTCGTCCCGGCCTGC 22
sko-miR-92c      TATTGCACTCGTCCCGGCCTGT 22
                  *****

pmi-miR-92d      TATTGCACTCGTCCCGGCCTAG 22

spu-miR-96       TTTGGCACTAGCACATTTTGC 21
pmi-miR-96       TTTGGCACTAGCACATTTTGC 21
sko-miR-96       TTTGGCACTAGCACATTTTGC 21
                  *****

spu-miR-981      TTCGTTGTCAACGAAACCTGC 21
```
